# Supplementary material for: Complexes of NiII, CoII, ZnII, and CuII with Promising Anti-Tuberculosis Drug: Solid-State Structures and DFT Calculations
Source: MDPI journal article supplement (doi:10.3390/inorganics11040167), 2023-04-16
Supplement: s1 [file s1]

## Supporting information for the article

### Complexes of Ni<sup>II</sup>, Co<sup>II</sup>, Zn<sup>II</sup>, and Cu<sup>II</sup> with Promising Anti-Tuberculosis Drug: Solid-State Structures and DFT Calculations

Mohamed Ali Ahmed,<sup>1, 2</sup> Maksim A. Zhernakov,<sup>1</sup> Edward M. Gilyazetdinov,<sup>1</sup> Mikhail S. Buharov,<sup>1</sup> Daut R. Islamov,<sup>1, 3</sup> Konstantin S. Usachev,<sup>3</sup> Alexander E. Klimovitskii,<sup>1</sup> Nikita Yu. Serov,<sup>1</sup> Vladimir A. Burilov<sup>1</sup> and Valery G. Shtyrin<sup>1, \*</sup>

Kazan Federal University Kremlevskaya St., 18, Kazan, 420008, Russian Federation

E-mail: valery.shtyrin@gmail.com

#### Table of content

|                                 |           |
|---------------------------------|-----------|
| <b>Crystal structure.....</b>   | <b>S2</b> |
| <b>Isomeric conversion.....</b> | <b>S4</b> |
| <b>Mass-spectrometry .....</b>  | <b>S5</b> |
| <b>DFT calculations .....</b>   | <b>S7</b> |

## Crystal structure

**Table S1.** Crystallographical data of the  $\frac{1}{\infty}\{[\text{CuLCl}] \cdot 0.5\text{H}_2\text{O}\}$

|                                      |                                                                                                                                                 |
|--------------------------------------|-------------------------------------------------------------------------------------------------------------------------------------------------|
| Compound                             | $\frac{1}{\infty}\{[\text{CuLCl}] \cdot 0.5\text{H}_2\text{O}\}$                                                                                |
| Empirical formula                    | $\text{C}_{15}\text{H}_{16}\text{ClCuN}_4\text{O}_{4.5}$                                                                                        |
| Formula weight                       | 423.31 g* $\text{mol}^{-1}$                                                                                                                     |
| Temperature                          | 99.9(7) K                                                                                                                                       |
| Wavelength                           | 1.54184 Å                                                                                                                                       |
| Crystal system                       | monoclinic                                                                                                                                      |
| Space group                          | $P2_1/n$ (#14)                                                                                                                                  |
| Unit cell dimensions                 | $a = 16.3539(11)$ Å,<br>$b = 12.2647(6)$ Å,<br>$c = 17.4916(10)$ Å,<br>$\alpha = 90^\circ$<br>$\beta = 108.431(7)^\circ$<br>$\gamma = 90^\circ$ |
| Volume                               | 3328.4(4) Å <sup>3</sup>                                                                                                                        |
| Z                                    | 8                                                                                                                                               |
| Density (calculated)                 | 1.689 g/cm <sup>3</sup>                                                                                                                         |
| Absorption coefficient               | 3.636 mm <sup>-1</sup>                                                                                                                          |
| $F(000)$                             | 1728                                                                                                                                            |
| Crystal size                         | 0.05 x 0.20 x 0.31 mm <sup>3</sup>                                                                                                              |
| Theta range for data collection      | $8.95^\circ \leq 2\theta \leq 153.062^\circ$                                                                                                    |
| Reflections collected                | 17815                                                                                                                                           |
| Independent reflections              | 6353                                                                                                                                            |
| Goodness-of-fit on $F^2$             | 1.132                                                                                                                                           |
| Final R indices [ $I > 2\sigma(I)$ ] | 0.0680                                                                                                                                          |
| R indices (all data)                 | 0.1640                                                                                                                                          |
| Largest diff. peak and hole          | 1.014 and $-0.686$ e.Å <sup>-3</sup>                                                                                                            |

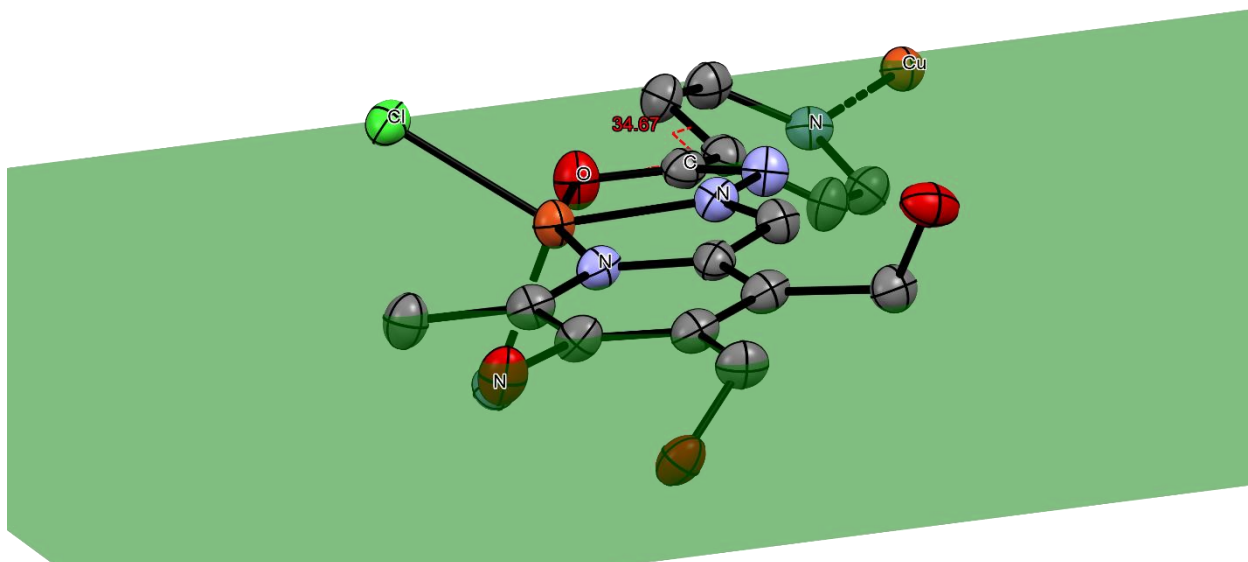

**Figure S1.** Planar view of  $\frac{1}{\infty}\{[\text{CuLCl}] \cdot 0.5\text{H}_2\text{O}\}$ .

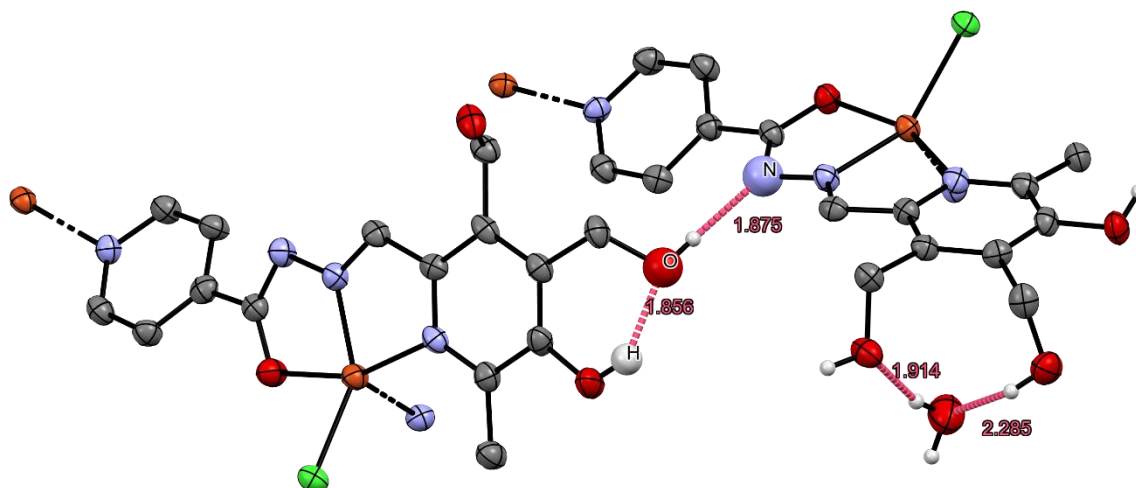

**Figure S2.** System of the H-bonds for  $\frac{1}{\infty}\{[\text{CuLCl}] \cdot 0.5\text{H}_2\text{O}\}$ .

## Isomeric conversion

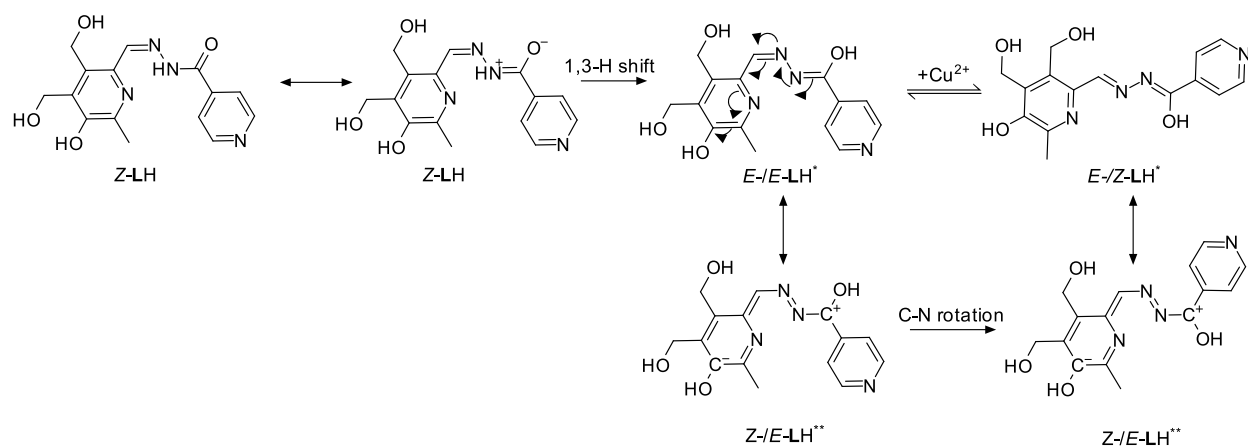

**Figure S3.** Possible isomeric conversion of the **LH** ligand in solution.

## Mass-spectrometry

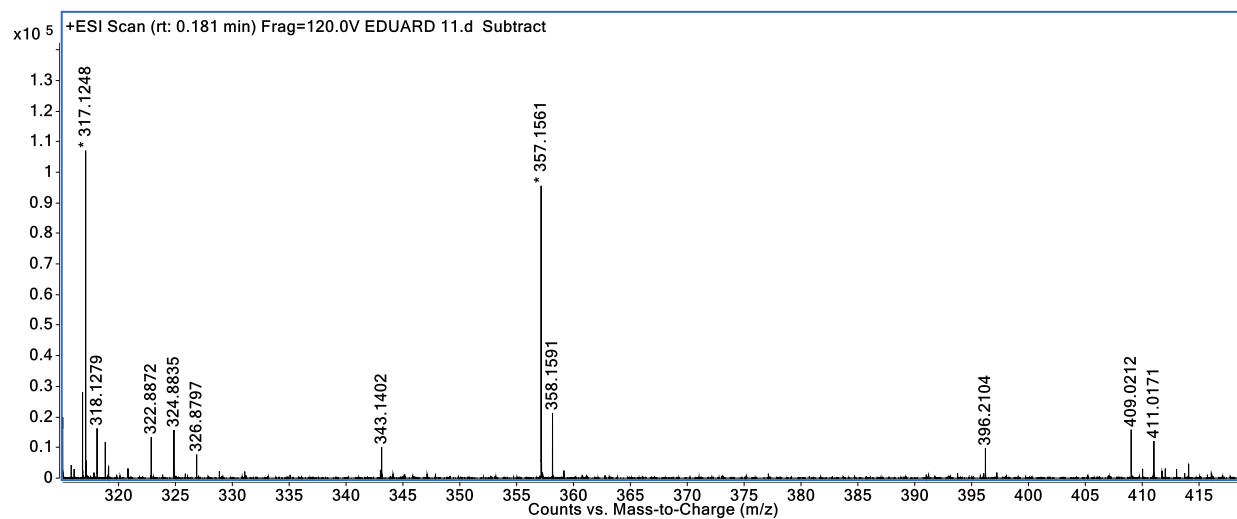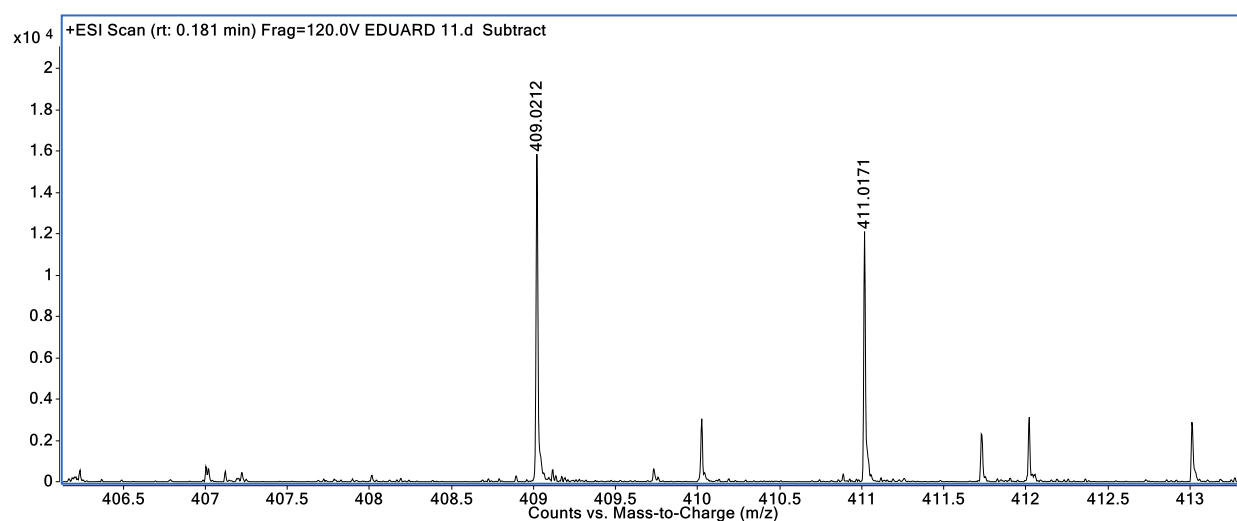

**Figure S4.** Mass spectra of the Ni-LH complex.

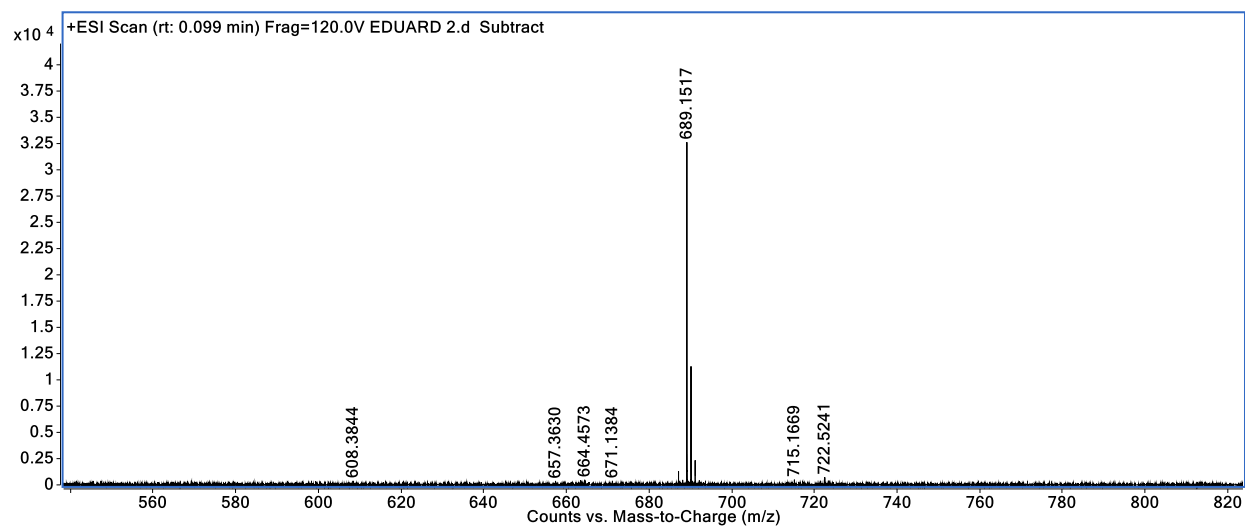

**Figure S5.** Mass spectrum of the Co-LH complex.

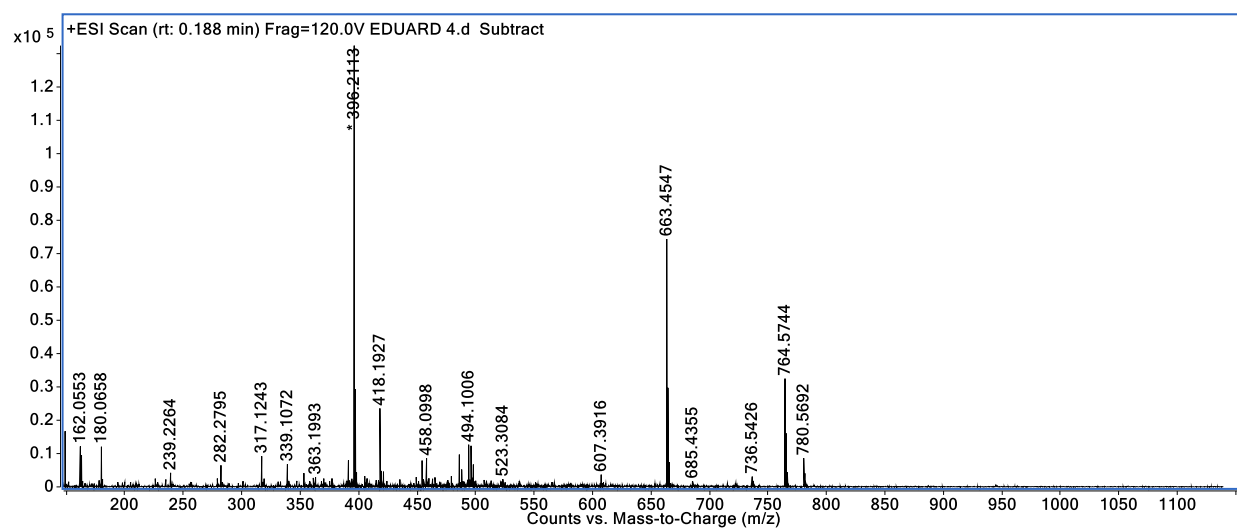

**Figure S6.** Mass spectrum of the Zn-LH complex.

## DFT calculations

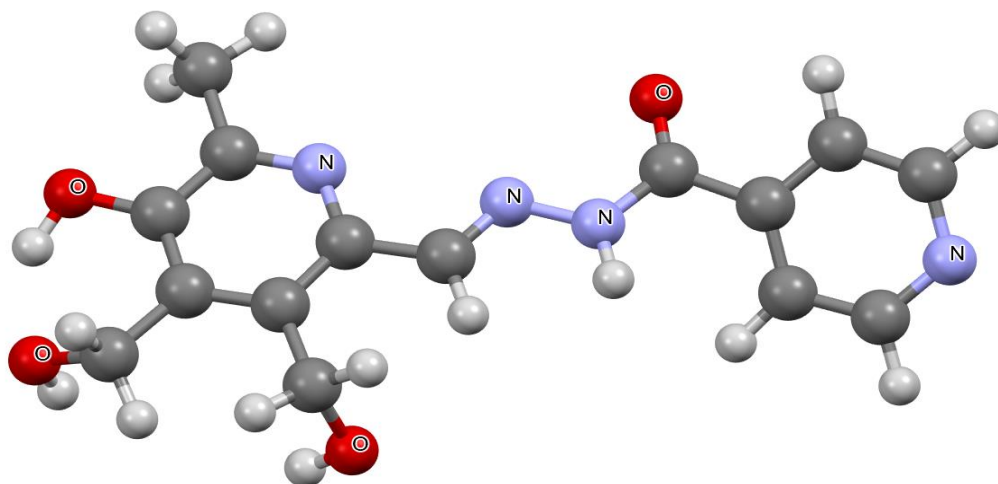

**Figure S7.** Structure and formation energy (in atomic units, a.u.) of *E*-LH conformer optimized on the B3LYP/def2-TZVPP level with accounting solvent effects in the C-PCM model and dispersion correction (D3BJ),  $E = -1101.03435$  a.u.

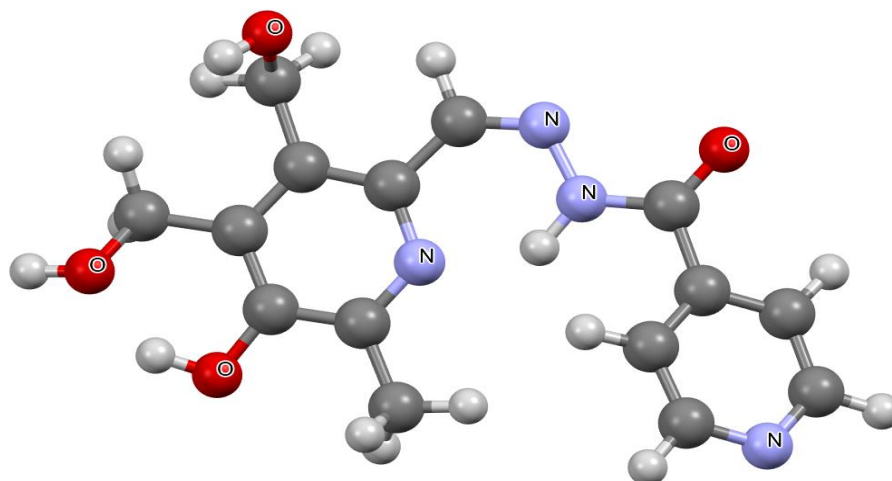

**Figure S8.** Structure and formation energy (in atomic units, a.u.) of *Z*-LH conformer optimized on the B3LYP/def2-TZVPP level with accounting solvent effects in the C-PCM model and dispersion correction (D3BJ),  $E = -1101.03921$  a.u.

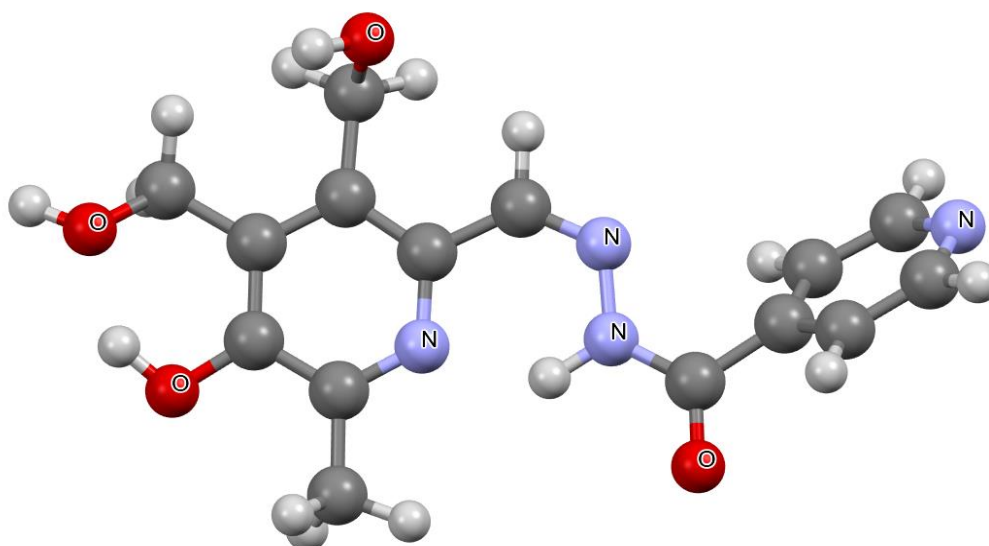

**Figure S9.** Structure and formation energy (in atomic units, a.u.) of Z-LH conformer optimized on the B3LYP/def2-TZVPP level with accounting solvent effects in the C-PCM model and dispersion correction (D3BJ),  $E = -1101.03518$  a.u.

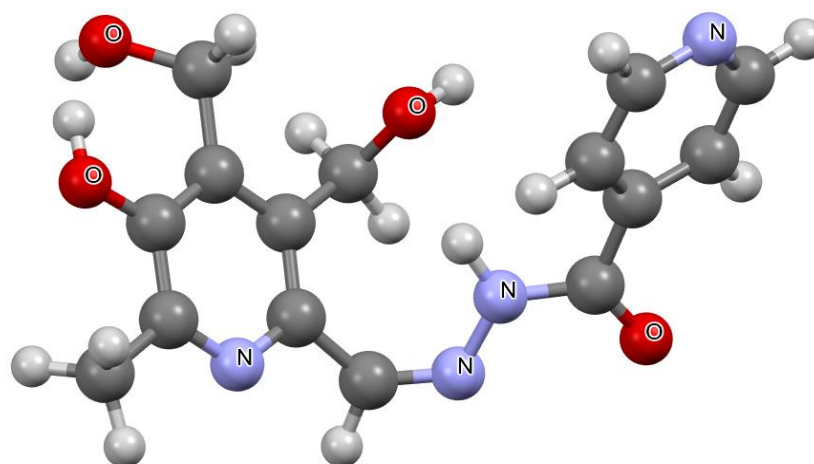

**Figure S10.** Structure and formation energy (in atomic units, a.u.) of Z-LH conformer optimized on the B3LYP/def2-TZVPP level with accounting solvent effects in the C-PCM model and dispersion correction (D3BJ),  $E = -1101.03257$  a.u.



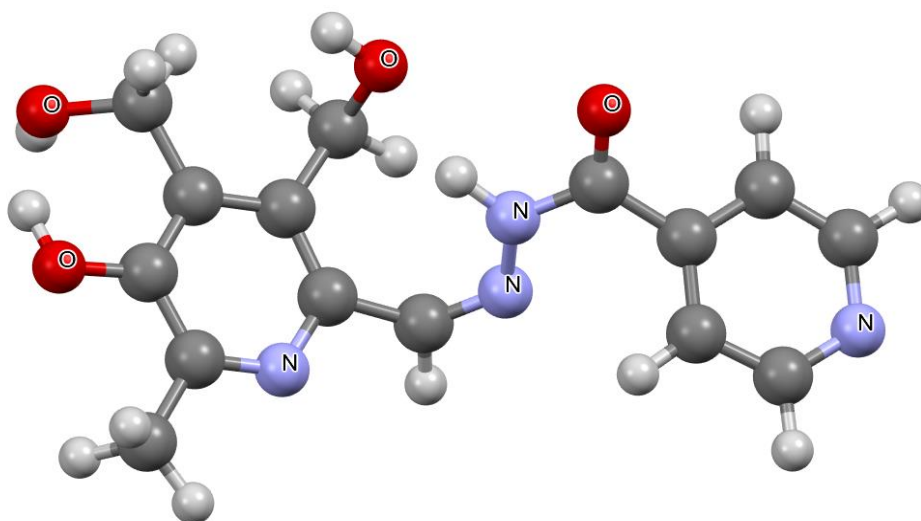

**Figure S11.** Structure and formation energy (in atomic units, a.u.) of Z-LH optimized on the B3LYP/def2-TZVPP level with accounting solvent effects in the C-PCM model and dispersion correction (D3BJ),  $E = -1101.02839$  a.u.

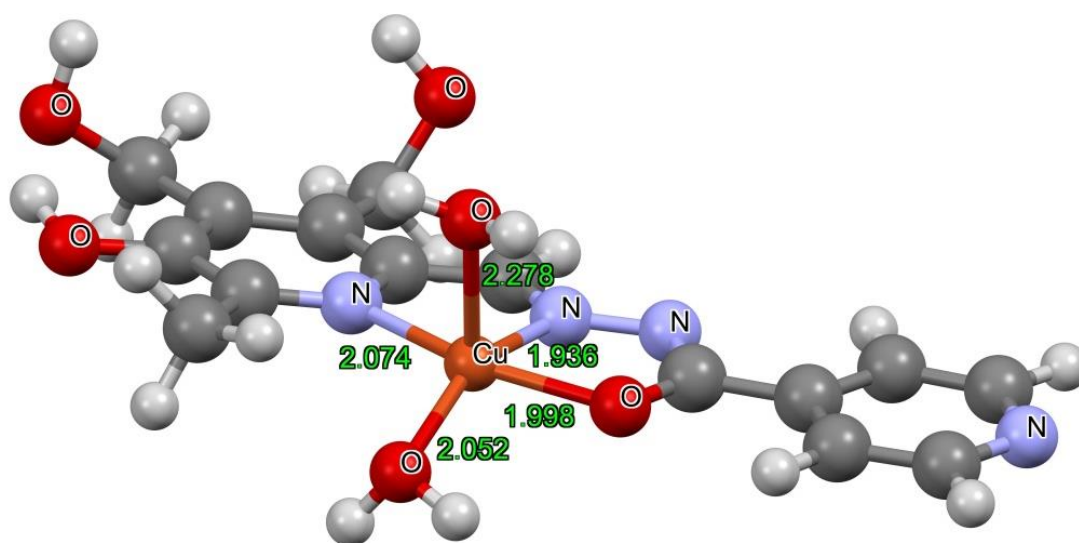

**Figure S12.** Structure of  $[\text{CuL}(\text{H}_2\text{O})_2]$  complex and selected interatomic distances optimized on the B3LYP/def2-TZVPP level with accounting solvent effects in the C-PCM model and dispersion correction (D3BJ).

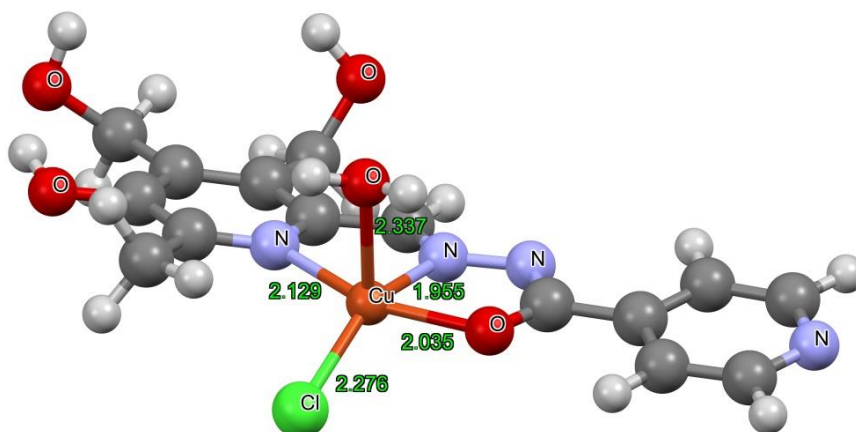

**Figure S13.** Structure of [CuL(H<sub>2</sub>O)Cl] complex and selected interatomic distances optimized on the B3LYP/def2-TZVPP level with accounting solvent effects in the C-PCM model and dispersion correction (D3BJ).
